# Supplementary material for: A randomised trial of anti-GM-CSF otilimab in severe COVID-19 pneumonia (OSCAR)
Source: PubMed Central journal article supplement — Eur Respir J. 2023 Feb 2;61(2):2101870. doi: 10.1183/13993003.01870-2021 (PMC9558428; doi:10.1183/13993003.01870-2021), 2023-02-02
Supplement: ERJ-01870-2021.Shareable.pdf [file ERJ-01870-2021.Shareable.pdf]

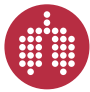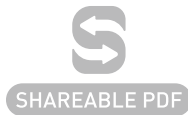

# A randomised trial of anti-GM-CSF otilimab in severe COVID-19 pneumonia (OSCAR)

Jatin Patel<sup>1</sup>, Damon Bass<sup>2</sup>, Albertus Beishuizen<sup>3</sup>, Xavier Bocca Ruiz<sup>4</sup>, Hatem Boughanmi<sup>5</sup>, Anthony Cahn<sup>1</sup>, Hugo Colombo<sup>6</sup>, Gerard J. Criner<sup>7</sup>, Katherine Davy<sup>1</sup>, Javier de-Miguel-Díez<sup>8,9</sup>, Pablo A. Doreski<sup>10</sup>, Sofia Fernandes<sup>1</sup>, Bruno François<sup>11</sup>, Anubha Gupta<sup>1</sup>, Kate Hanrott<sup>1</sup>, Timothy Hatlen<sup>12</sup>, Dave Inman<sup>1</sup>, John D. Isaacs<sup>13</sup>, Emily Jarvis<sup>1</sup>, Natalia Kostina<sup>14</sup>, Tatiana Kropotina<sup>15</sup>, Jean-Claude Lacherade<sup>16</sup>, Divya Lakshminarayanan<sup>17</sup>, Pedro Martinez-Ayala<sup>18</sup>, Charlene McEvoy<sup>19,20,21</sup>, Ferhat Meziani<sup>22,23</sup>, Mehran Monchi<sup>24</sup>, Sumanta Mukherjee<sup>17</sup>, Rosana Muñoz-Bermúdez<sup>25</sup>, Jessica Neisen<sup>1</sup>, Ciara O'Shea<sup>26</sup>, Gaëtan Planteffeve<sup>1</sup>, Lorrie Schifano<sup>2</sup>, Lee E. Schwab<sup>28</sup>, Zainab Shahid<sup>29</sup>, Michinori Shirano<sup>30</sup>, Julia E. Smith<sup>1</sup>, Eduardo Sprinz<sup>31</sup>, Charlotte Summers<sup>1</sup>, Nicolas Terzi<sup>1</sup>, Mark A. Tidswell<sup>36</sup>, Yuliya Trefilova<sup>37</sup>, Russell Williamson<sup>1</sup>, Duncan Wyncoll<sup>38</sup> and Mark Layton<sup>1</sup>

<sup>1</sup>GSK Medicines Research Centre, Stevenage, UK. <sup>2</sup>GSK, Research Triangle Park, NC, USA. <sup>3</sup>Intensive Care Center, Medisch Spectrum Twente, Enschede, The Netherlands. <sup>4</sup>Servicio de Neumología, Clínica Monte Grande, Buenos Aires, Argentina. <sup>5</sup>Service de Réanimation, CH Valenciennes - Hôpital Jean Bernard, Valenciennes Cedex, France. <sup>6</sup>Clinica Privada Colombo, Córdoba, Argentina. <sup>7</sup>Dept of Thoracic Medicine and Surgery, Lewis Katz School of Medicine, Temple University Hospital, Philadelphia, PA, USA. <sup>8</sup>Respiratory Dept, Hospital General Universitario Gregorio Marañón, Madrid, Spain. <sup>9</sup>Facultad de Medicina, Universidad Complutense de Madrid, Instituto de Investigación Sanitaria Gregorio Marañón, Madrid, Spain. <sup>10</sup>Clinica Independencia de Munro, Buenos Aires, Argentina. <sup>11</sup>Service Réanimation Polyvalente and Inserm CIC1435 & UMR1092, CHU Limoges, Limoges Cedex, France. <sup>12</sup>Harbor-UCLA Medical Center, Torrance, CA, USA. <sup>13</sup>Newcastle University and Newcastle upon Tyne Hospitals NHS Foundation Trust, Newcastle upon Tyne, UK. <sup>14</sup>Voronezh Regional Clinical Hospital, Voronezh, Russia. <sup>15</sup>BUZ Regional Clinical Hospital, Omsk, Russia. <sup>16</sup>Service de Médecine Intensive Réanimation, CHD Vendée - Site De La Roche-sur-Yon, La Roche-Sur-Yon, France. <sup>17</sup>GSK, Collegeville, PA, USA. <sup>18</sup>Hospital Civil Fray Antonio Alcalde, Guadalajara, Mexico. <sup>19</sup>Regions Hospital, St. Paul, MN, USA. <sup>20</sup>Methodist Hospital, St. Louis Park, MN, USA. <sup>21</sup>HealthPartners Institute, Bloomington, MN, USA. <sup>22</sup>Dept of Intensive Care, Service de Médecine Intensive - Réanimation, Nouvel Hôpital Civil, Hôpital Universitaire de Strasbourg, Strasbourg, France. <sup>23</sup>CRICS-TRIGGERSEP F-CRIN Network, Strasbourg, France. <sup>24</sup>Groupe Hospitalier Sud Ile-de-France, Melun, France. <sup>25</sup>Hospital del Mar-IMIM, Barcelona, Spain. <sup>26</sup>GSK, Dublin, Ireland. <sup>27</sup>Service de Réanimation Polyvalente, CH Victor Dupouy, Argenteuil, France. <sup>28</sup>Holy Cross Health, Silver Spring, MD, USA. <sup>29</sup>Levine Cancer Institute, Atrium Health, Charlotte, NC, USA. <sup>30</sup>Osaka City General Hospital, Osaka, Japan. <sup>31</sup>Hospital de Clínicas de Porto Alegre, Porto Alegre, Brazil. <sup>32</sup>Dept of Medicine, University of Cambridge School of Clinical Medicine, Cambridge, UK. <sup>33</sup>Médecine Intensive Réanimation, CHU Grenoble-Alpes, Grenoble, France. <sup>34</sup>Université Grenoble-Alpes, Grenoble, France. <sup>35</sup>INSERM U1042, Grenoble, France. <sup>36</sup>Pulmonary and Critical Care, Baystate Medical Centre, Springfield, MA, USA. <sup>37</sup>Perm Regional Clinical Hospital, Perm, Russia. <sup>38</sup>Dept of Critical Care, Guy's and St Thomas' NHS Foundation Trust, London, UK.

Corresponding author: Anthony Cahn ([tony.x.cahn@gsk.com](mailto:tony.x.cahn@gsk.com))

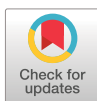

Shareable abstract (@ERSpublications)

**Therapeutic blocking of GM-CSF with otilimab did not significantly improve clinical status in patients with severe COVID-19; however, otilimab demonstrated an acceptable safety profile and reduced markers of inflammation** <https://bit.ly/3QquyYP>

**Cite this article as:** Patel J, Bass D, Beishuizen A, *et al.* A randomised trial of anti-GM-CSF otilimab in severe COVID-19 pneumonia (OSCAR). *Eur Respir J* 2023; 61: 2101870 [DOI: 10.1183/13993003.01870-2021].

This single-page version can be shared freely online.

Copyright ©The authors 2023.

This version is distributed under the terms of the Creative Commons Attribution Non-Commercial Licence 4.0. For commercial reproduction rights and permissions contact [permissions@ersnet.org](mailto:permissions@ersnet.org)

## Abstract

**Background** Granulocyte–macrophage colony-stimulating factor (GM-CSF) and dysregulated myeloid cell responses are implicated in the pathophysiology and severity of COVID-19.

**Methods** In this randomised, sequential, multicentre, placebo-controlled, double-blind study, adults aged 18–79 years (Part 1) or ≥70 years (Part 2) with severe COVID-19, respiratory failure and systemic inflammation (elevated C-reactive protein/ferritin) received a single intravenous infusion of otilimab 90 mg (human anti-GM-CSF monoclonal antibody) plus standard care (NCT04376684). The primary outcome was the proportion of patients alive and free of respiratory failure at Day 28.

**Results** In Part 1 (n=806 randomised 1:1 otilimab:placebo), 71% of otilimab-treated patients were alive and free of respiratory failure at Day 28 *versus* 67% who received placebo; the model-adjusted difference of 5.3%

This article has an editorial commentary:

<https://doi.org/10.1183/13993003.02091-2022>

Received: 2 July 2021

Accepted: 24 Aug 2022

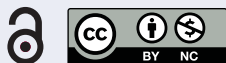

was not statistically significant (95% CI  $-0.8$ – $11.4\%$ ,  $p=0.09$ ). A nominally significant model-adjusted difference of  $19.1\%$  (95% CI  $5.2$ – $33.1\%$ ,  $p=0.009$ ) was observed in the predefined 70–79 years subgroup, but this was not confirmed in Part 2 ( $n=350$  randomised) where the model-adjusted difference was  $0.9\%$  (95% CI  $-9.3$ – $11.2\%$ ,  $p=0.86$ ). Compared with placebo, otilimab resulted in lower serum concentrations of key inflammatory markers, including the putative pharmacodynamic biomarker CC chemokine ligand 17, indicative of GM-CSF pathway blockade. Adverse events were comparable between groups and consistent with severe COVID-19.

**Conclusions** There was no significant difference in the proportion of patients alive and free of respiratory failure at Day 28. However, despite the lack of clinical benefit, a reduction in inflammatory markers was observed with otilimab, in addition to an acceptable safety profile.
